# Supplementary material for: Molecular Variation and Horizontal Gene Transfer of the Homocysteine Methyltransferase Gene mmuM and its Distribution in Clinical Pathogens
Source: PubMed Central journal article supplement — Int J Biol Sci. 2015 Jan 1;11(1):11–21. doi: 10.7150/ijbs.10320 (PMC4278250; doi:10.7150/ijbs.10320), 2015-01-01
Supplement: ijbsv11p0011s1.pdf [file ijbsv11p0011s1.pdf]

## Supplementary Tables

Table S1. Clusters and representative sequences of *mmuM* genes in phylogenetic analysis

| Genus                     | <i>mmuM</i> number | Cluster number | Representative sequence accession number                                                                                                                                                                                                                                                                                               |
|---------------------------|--------------------|----------------|----------------------------------------------------------------------------------------------------------------------------------------------------------------------------------------------------------------------------------------------------------------------------------------------------------------------------------------|
| <i>Streptococcus</i>      | 134                | 11             | 1:NC_015215, 2:NZ_GL698429, 3:NZ_AEUW02000001, 4:NZ_AOCD01000153, 5:AEWY01000003, 6:NZ_AOC E01000112, 7:NC_021213, 8:NC_006448, 9:AEQQ01000050, 10:CP003295, 11:NC_021175                                                                                                                                                              |
| <i>Klebsiella</i>         | 71                 | 1              | 1:NC_013951                                                                                                                                                                                                                                                                                                                            |
| <i>Lactobacillus</i>      | 47                 | 20             | 1:NC_015602, 2:ACLM01000020, 3:NC_021235, 4:NC_015214, 5:NC_010609, 6:NZ_BACP01000056, 7:NZ_KB644915, 8:NZ_BACN01000068, 9:NC_014106, 10:NZ_GL575016, 11:ACGH01000012, 12:ACHN0100004 8, 13:ACGT01000005, 14:CP002461, 15:NZ_BAC001000009, 16:NZ_GL872382, 17:NZ_BACR01000045, 18 :NZ_AEOS01000240, 19:NZ_AHYZ01000112, 20:NZ_GL573154 |
| <i>Mycobacterium</i>      | 45                 | 5              | 1:NC_011896, 2:NZ_AJF101000060, 3:NC_021192, 4:NZ_ANPD01000034, 5:CP003491                                                                                                                                                                                                                                                             |
| <i>Bacillus</i>           | 32                 | 7              | 1:NC_006270, 2:NC_014976, 3:CP003017, 4:NC_010180, 5:NZ_AJRJ01000051, 6:CP002927, 7:NC_0098 48                                                                                                                                                                                                                                         |
| <i>Escherichia</i>        | 27                 | 2              | 1:NZ_BAFF01000003, 2:NC_010558                                                                                                                                                                                                                                                                                                         |
| <i>Xanthomonas</i>        | 26                 | 4              | 1:AE008922, 2:NZ_CAPJ01000396, 3:NC_013722, 4:NZ_AGDB01000215                                                                                                                                                                                                                                                                          |
| <i>Streptomyces</i>       | 19                 | 13             | 1:NZ_ANSJ01000037, 2:NZ_AHBF01000011, 3:NZ_CM001015, 4:CP002047, 5:NZ_AJSZ01000210, 6:AROY 01000536, 7:NZ_AOHP01000162, 8:NZ_AGBF01000190, 9:NZ_DS999647, 10:NZ_AORZ01000064, 11:BA00 0030, 12:NZ_ADXA01000021, 13:NZ_AJJM01000167                                                                                                     |
| <i>Leuconostoc</i>        | 10                 | 3              | 1:NZ_AEIZ01000018, 2:CP003839, 3:NZ_CAGE01000005                                                                                                                                                                                                                                                                                       |
| <i>Enterobacter</i>       | 10                 | 2              | 1:CP005991, 2:NZ_GL892086                                                                                                                                                                                                                                                                                                              |
| <i>Pantoea</i>            | 7                  | 1              | 1:NC_013956                                                                                                                                                                                                                                                                                                                            |
| <i>Citrobacter</i>        | 6                  | 1              | 1:NZ_ANAV01000008                                                                                                                                                                                                                                                                                                                      |
| <i>Serratia</i>           | 6                  | 1              | 1:ADBY01000045                                                                                                                                                                                                                                                                                                                         |
| <i>Selenomonas</i>        | 5                  | 3              | 1:ACKT01000013, 2:ACLA01000014, 3:NZ_ALJR01000025                                                                                                                                                                                                                                                                                      |
| <i>Pectobacterium</i>     | 4                  | 1              | 1:NZ_ABVY01000021                                                                                                                                                                                                                                                                                                                      |
| <i>Actinomyces</i>        | 4                  | 2              | 1:NZ_GL985606, 2:GL877176                                                                                                                                                                                                                                                                                                              |
| <i>Cronobacter</i>        | 4                  | 1              | 1:NC_013282                                                                                                                                                                                                                                                                                                                            |
| <i>Clostridium</i>        | 4                  | 2              | 1:NC_011837, 2:NC_003030                                                                                                                                                                                                                                                                                                               |
| <i>Paenibacillus</i>      | 4                  | 2              | 1:NZ_AFW01000056, 2:CP003107                                                                                                                                                                                                                                                                                                           |
| <i>Chloroflexus</i>       | 3                  | 1              | 1:NC_010175                                                                                                                                                                                                                                                                                                                            |
| <i>Corynebacterium</i>    | 3                  | 3              | 1:NC_012590, 2:ACGE01000080, 3:NZ_AFIZ01000001                                                                                                                                                                                                                                                                                         |
| <i>Arthrobacter</i>       | 3                  | 3              | 1:NC_008711, 2:NZ_BAEG01000083, 3:NC_011886                                                                                                                                                                                                                                                                                            |
| <i>Staphylococcus</i>     | 3                  | 3              | 1:NZ_CAJL01000012, 2:NZ_ALWK01000004, 3:NC_007350                                                                                                                                                                                                                                                                                      |
| <i>Rubrivivax</i>         | 2                  | 1              | 1:NZ_AEWG01000063                                                                                                                                                                                                                                                                                                                      |
| <i>Saccharomonospora</i>  | 2                  | 2              | 1:NC_013159, 2:NZ_AHGX01000043                                                                                                                                                                                                                                                                                                         |
| <i>Pseudomonas</i>        | 2                  | 2              | 1:CP000094, 2:NZ_CM001763                                                                                                                                                                                                                                                                                                              |
| <i>Saccharopolyspora</i>  | 2                  | 2              | 1:NC_009142, 2:NZ_GL877878                                                                                                                                                                                                                                                                                                             |
| <i>Dialister</i>          | 2                  | 1              | 1:NZ_GL878519                                                                                                                                                                                                                                                                                                                          |
| <i>Brevibacterium</i>     | 2                  | 2              | 1:NZ_AMSP01000006, 2:NZ_AAGP01000014                                                                                                                                                                                                                                                                                                   |
| <i>Mannheimia</i>         | 2                  | 1              | 1:NC_021082                                                                                                                                                                                                                                                                                                                            |
| <i>Clavibacter</i>        | 2                  | 1              | 1:NC_010407                                                                                                                                                                                                                                                                                                                            |
| <i>Pelagibacter</i>       | 2                  | 2              | 1:NC_007205, 2:NZ_DS995298                                                                                                                                                                                                                                                                                                             |
| <i>Peptoniphilus</i>      | 1                  | 1              | 1:NZ_JH165061                                                                                                                                                                                                                                                                                                                          |
| <i>Caldilinea</i>         | 1                  | 1              | 1:AP012337                                                                                                                                                                                                                                                                                                                             |
| <i>Shigella</i>           | 1                  | 1              | 1:NZ_AKNF01000196                                                                                                                                                                                                                                                                                                                      |
| <i>Blastococcus</i>       | 1                  | 1              | 1:NC_016943                                                                                                                                                                                                                                                                                                                            |
| <i>Erwinia</i>            | 1                  | 1              | 1:NC_014306                                                                                                                                                                                                                                                                                                                            |
| <i>Plesiocystis</i>       | 1                  | 1              | 1:NZ_ABCS01000038                                                                                                                                                                                                                                                                                                                      |
| <i>Dinoroseobacter</i>    | 1                  | 1              | 1:CP000832                                                                                                                                                                                                                                                                                                                             |
| <i>Sporolactobacillus</i> | 1                  | 1              | 1:NZ_AFVQ01000089                                                                                                                                                                                                                                                                                                                      |
| <i>Tetrasphaera</i>       | 1                  | 1              | 1:NZ_HF570956                                                                                                                                                                                                                                                                                                                          |
| <i>Weissella</i>          | 1                  | 1              | 1:NZ_AEKT01000057                                                                                                                                                                                                                                                                                                                      |

|                          |     |     |                   |
|--------------------------|-----|-----|-------------------|
| <i>Coralloccoccus</i>    | 1   | 1   | 1:CP003389        |
| <i>Granulibacter</i>     | 1   | 1   | 1:NC_008343       |
| <i>Planococcus</i>       | 1   | 1   | 1:NZ_AJYB01000042 |
| <i>Brevibacillus</i>     | 1   | 1   | 1:NC_012491       |
| <i>Oscillibacter</i>     | 1   | 1   | 1:AP012044        |
| <i>Halobacillus</i>      | 1   | 1   | 1:NZ_ANPF01000013 |
| <i>Centipeda</i>         | 1   | 1   | 1:NZ_GL892076     |
| <i>Modestobacter</i>     | 1   | 1   | 1:F0203431        |
| <i>Rheinheimera</i>      | 1   | 1   | 1:NZ_BAFK01000013 |
| <i>Hylemonella</i>       | 1   | 1   | 1:NZ_AEGR01000052 |
| <i>Nocardiosis</i>       | 1   | 1   | 1:CP003788        |
| <i>Acidobacterium</i>    | 1   | 1   | 1:NC_012483       |
| <i>Ilumatobacter</i>     | 1   | 1   | 1:NC_020520       |
| <i>Salmonella</i>        | 1   | 1   | 1:FR877557        |
| <i>Janibacter</i>        | 1   | 1   | 1:NZ_CH672413     |
| <i>Acidaminococcus</i>   | 1   | 1   | 1:CP003058        |
| <i>Nakamurella</i>       | 1   | 1   | 1:NC_013235       |
| <i>Kitasatospora</i>     | 1   | 1   | 1:AP010968        |
| <i>Macroccoccus</i>      | 1   | 1   | 1:NC_011999       |
| <i>Kineosphaera</i>      | 1   | 1   | 1:NZ_BAHD01000020 |
| <i>Raoultella</i>        | 1   | 1   | 1:NC_021066       |
| <i>Exiguobacterium</i>   | 1   | 1   | 1:NC_010556       |
| <i>Brachybacterium</i>   | 1   | 1   | 1:NZ_AGBX01000007 |
| <i>Propionibacterium</i> | 1   | 1   | 1:NC_019395       |
| <i>Mobilicoccus</i>      | 1   | 1   | 1:NZ_BAFE01000089 |
| <i>Amycoliticoccus</i>   | 1   | 1   | 1:NC_015564       |
| <i>Microclunatus</i>     | 1   | 1   | 1:NC_015635       |
| <i>Kosakonia</i>         | 1   | 1   | 1:NZ_JH725436     |
| Total                    | 533 | 144 |                   |

Table S2. The reference sequences for *mmuM* gene mapping

| Genus                | <i>mmuM</i> number | Cluster number | Reference sequence accession number                                                                                                                                                                                                                                                                                                   |
|----------------------|--------------------|----------------|---------------------------------------------------------------------------------------------------------------------------------------------------------------------------------------------------------------------------------------------------------------------------------------------------------------------------------------|
| <i>Streptococcus</i> | 134                | 16             | 1:AEQQ01000050, 2:NC_012925, 3:AP012336, 4:NZ_AEUW02000002, 5:NC_006449, 6:AEKN01000006, 7:NZ_AGBV01000004, 8:NZ_GL982563, 9:NC_021175, 10:CP003295, 11:NC_015215, 12:NZ_AEUW02000001, 13:NZ_AOCD01000153, 14:NZ_GL698429, 15:NZ_AOCE01000112, 16:GL698449                                                                            |
| <i>Klebsiella</i>    | 71                 | 3              | 1:NC_013951, 2:APWG01000155, 3:NZ_AMPJ01000047                                                                                                                                                                                                                                                                                        |
| <i>Lactobacillus</i> | 47                 | 20             | 1:NC_015602, 2:NZ_GL573154, 3:NZ_BACP01000056, 4:ACLM01000020, 5:NC_007929, 6:NZ_GL872382, 7:CP002461, 8:ACGZ02000030, 9:NZ_BACN01000068, 10:NC_021235, 11:NZ_BAC001000009, 12:NZ_GL575016, 13:NC_015214, 14:NZ_BACR01000045, 15:NC_006814, 16:NZ_AEOS01000240, 17:ACHG01000196, 18:ACKR01000173, 19:ACGH01000012, 20:NZ_AHYZ01000112 |
| <i>Mycobacterium</i> | 45                 | 6              | 1:NZ_ANPD01000034, 2:NZ_AJFI01000060, 3:CP003491, 4:NC_011896, 5:NZ_AFWW02000005, 6:NC_009565                                                                                                                                                                                                                                         |
| <i>Bacillus</i>      | 32                 | 8              | 1:NZ_AJRJ01000051, 2:NC_006270, 3:NC_020272, 4:NZ_AOTY01000005, 5:CP003017, 6:NZ_JH600284, 7:NC_009848, 8:NC_010180                                                                                                                                                                                                                   |
| <i>Escherichia</i>   | 27                 | 1              | 1:NZ_BAFF01000003                                                                                                                                                                                                                                                                                                                     |
| <i>Xanthomonas</i>   | 26                 | 6              | 1:AE008922, 2:NC_006834, 3:NZ_CAPJ01000396, 4:NC_013722, 5:NZ_AGDB01000215, 6:NZ_AJRZ01000096                                                                                                                                                                                                                                         |
| <i>Streptomyces</i>  | 19                 | 15             | 1:CP002047, 2:AROY01000536, 3:NZ_AGBF01000190, 4:NC_003888, 5:NZ_ANSJ01000037, 6:NZ_CM001015, 7:NZ_AOHP01000162, 8:NZ_AORZ01000064, 9:BA000030, 10:NZ_ADXB01000305, 11:NZ_AJJM01000167, 12:NZ_AJSZ01000210, 13:NZ_JH725387, 14:NZ_DS999647, 15:NZ_AHBF01000011                                                                        |
| <i>Enterobacter</i>  | 10                 | 3              | 1:CP005991, 2:CP002824, 3:NZ_GL892086                                                                                                                                                                                                                                                                                                 |
| <i>Leuconostoc</i>   | 10                 | 4              | 1:CP002898, 2:NZ_CAGF01000002, 3:NZ_AEIZ01000018, 4:CP003839                                                                                                                                                                                                                                                                          |
| <i>Pantoea</i>       | 7                  | 2              | 1:NC_013956, 2:NC_014562                                                                                                                                                                                                                                                                                                              |
| <i>Citrobacter</i>   | 6                  | 1              | 1:NC_009792                                                                                                                                                                                                                                                                                                                           |
| <i>Serratia</i>      | 6                  | 3              | 1:NC_009832, 2:ADBY01000045, 3:NZ_AORJ01000064                                                                                                                                                                                                                                                                                        |

|                          |   |   |                                                   |
|--------------------------|---|---|---------------------------------------------------|
| <i>Selenomonas</i>       | 5 | 3 | 1:ACKT01000013, 2:ACLA01000014, 3:NZ_AENV01000002 |
| <i>Actinomyces</i>       | 4 | 2 | 1:GL877176, 2:NZ_GL985606                         |
| <i>Clostridium</i>       | 4 | 2 | 1:CP002118, 2:NC_011837                           |
| <i>Cronobacter</i>       | 4 | 1 | 1:NC_009778                                       |
| <i>Paenibacillus</i>     | 4 | 3 | 1:CP003107, 2:NZ_AFHW01000056, 3:HE577054         |
| <i>Pectobacterium</i>    | 4 | 1 | 1:NZ_ABVY01000021                                 |
| <i>Arthrobacter</i>      | 3 | 3 | 1:NC_011886, 2:NC_008711, 3:NZ_BAEG01000083       |
| <i>Chloroflexus</i>      | 3 | 2 | 1:NC_011831, 2:NC_010175                          |
| <i>Corynebacterium</i>   | 3 | 3 | 1:NZ_AFIZ01000001, 2:NC_012590, 3:ACGE01000080    |
| <i>Staphylococcus</i>    | 3 | 3 | 1:NZ_CAJL01000012, 2:NC_007350, 3:NZ_ALWK01000004 |
| <i>Brevibacterium</i>    | 2 | 2 | 1:NZ_AAGP01000014, 2:NZ_AMSP01000006              |
| <i>Clavibacter</i>       | 2 | 1 | 1:NC_009480                                       |
| <i>Dialister</i>         | 2 | 1 | 1:NZ_GL878519                                     |
| <i>Mannheimia</i>        | 2 | 1 | 1:NZ_DS264608                                     |
| <i>Pseudomonas</i>       | 2 | 2 | 1:CP000094, 2:NZ_CM001763                         |
| <i>Rubrivivax</i>        | 2 | 1 | 1:AP012320                                        |
| <i>Saccharomonospora</i> | 2 | 2 | 1:NC_013159, 2:NZ_AHGX01000043                    |
| <i>Saccharopolyspora</i> | 2 | 2 | 1:NZ_GL877878, 2:NC_009142                        |
| <i>Pelagibacter</i>      | 2 | 2 | 1:NZ_DS995298, 2:NC_007205                        |
| <i>Acidaminococcus</i>   | 1 | 1 | 1:CP003058                                        |
| <i>Acidobacterium</i>    | 1 | 1 | 1:NC_012483                                       |
| <i>Amycolicococcus</i>   | 1 | 1 | 1:NC_015564                                       |
| <i>Blastococcus</i>      | 1 | 1 | 1:NC_016943                                       |
| <i>Brachybacterium</i>   | 1 | 1 | 1:NZ_AGBX01000007                                 |
| <i>Brevibacillus</i>     | 1 | 1 | 1:NC_012491                                       |
| <i>Caldilinea</i>        | 1 | 1 | 1:AP012337                                        |
| <i>Centipeda</i>         | 1 | 1 | 1:NZ_GL892076                                     |
| <i>Corallococcus</i>     | 1 | 1 | 1:CP003389                                        |
| <i>Dinoroseobacter</i>   | 1 | 1 | 1:CP000832                                        |
| <i>Erwinia</i>           | 1 | 1 | 1:NC_014306                                       |
| <i>Exiguobacterium</i>   | 1 | 1 | 1:NC_010556                                       |
| <i>Granulibacter</i>     | 1 | 1 | 1:NC_008343                                       |
| <i>Halobacillus</i>      | 1 | 1 | 1:NZ_ANPF01000013                                 |
| <i>Hylemonella</i>       | 1 | 1 | 1:NZ_AEGR01000052                                 |
| <i>Ilumatobacter</i>     | 1 | 1 | 1:NC_020520                                       |
| <i>Janibacter</i>        | 1 | 1 | 1:NZ_CH672413                                     |
| <i>Kineosphaera</i>      | 1 | 1 | 1:NZ_BAHD01000020                                 |
| <i>Kitasatospora</i>     | 1 | 1 | 1:AP010968                                        |
| <i>Macrococcus</i>       | 1 | 1 | 1:NC_011999                                       |
| <i>Microclunatus</i>     | 1 | 1 | 1:NC_015635                                       |
| <i>Mobilicoccus</i>      | 1 | 1 | 1:NZ_BAFE01000089                                 |
| <i>Modestobacter</i>     | 1 | 1 | 1:F0203431                                        |
| <i>Nakamurella</i>       | 1 | 1 | 1:NC_013235                                       |
| <i>Nocardiopsis</i>      | 1 | 1 | 1:CP003788                                        |
| <i>Oscillibacter</i>     | 1 | 1 | 1:AP012044                                        |
| <i>Peptoniphilus</i>     | 1 | 1 | 1:NZ_JH165061                                     |
| <i>Planococcus</i>       | 1 | 1 | 1:NZ_AJYB01000042                                 |
| <i>Plesiocystis</i>      | 1 | 1 | 1:NZ_ABCS01000038                                 |

---

|                           |     |     |                   |
|---------------------------|-----|-----|-------------------|
| <i>Propionibacterium</i>  | 1   | 1   | 1:NC_019395       |
| <i>Rheinheimera</i>       | 1   | 1   | 1:NZ_BAFK01000013 |
| <i>Salmonella</i>         | 1   | 1   | 1:FR877557        |
| <i>Sporolactobacillus</i> | 1   | 1   | 1:NZ_AFVQ01000089 |
| <i>Tetrasphaera</i>       | 1   | 1   | 1:NZ_HF570956     |
| <i>Weissella</i>          | 1   | 1   | 1:NZ_AEKT01000057 |
| <i>Shigella</i>           | 1   | 0   | -                 |
| <i>Raoultella</i>         | 1   | 0   | -                 |
| <i>Kosakonia</i>          | 1   | 0   | -                 |
| Total                     | 533 | 160 |                   |

---
